# Supplementary material for: Distinct signals in medial and lateral VTA dopamine neurons modulate fear extinction at different times
Source: eLife journal article supplement (doi:10.7554/elife.54936), 2020-06-10

A

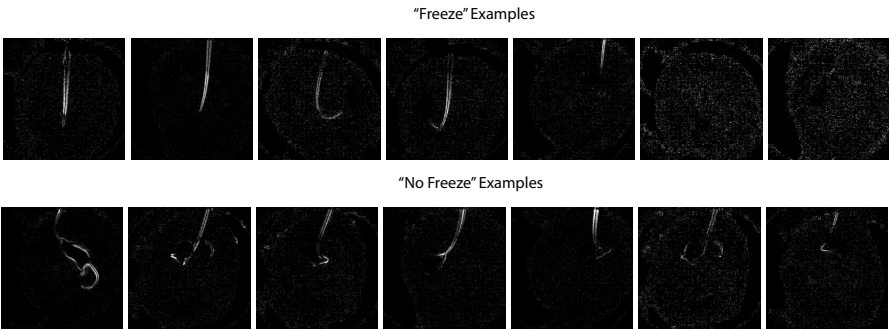

B

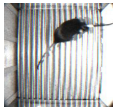

36,000 Images  
Freeze: 13,000  
No Freeze: 15,000  
32 mice

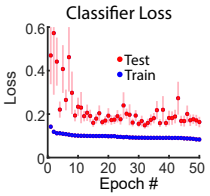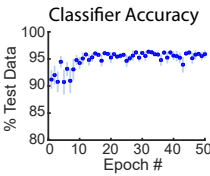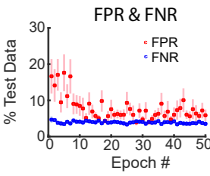

C

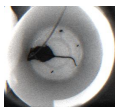

49,000 Images  
Freeze: 23,000  
No Freeze: 26,000  
6 mice

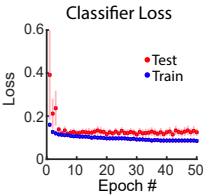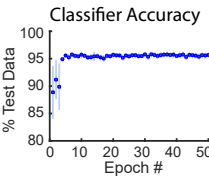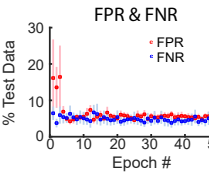

D

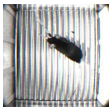

40,000 Images  
Freeze: 22,000  
No Freeze: 22,000  
63 mice

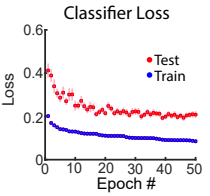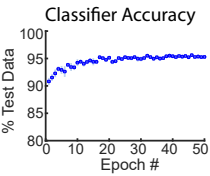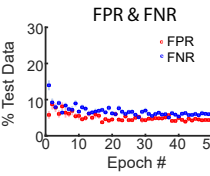

E

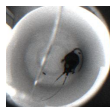

48,000 Images  
Freeze: 28,000  
No Freeze: 20,000  
6 mice

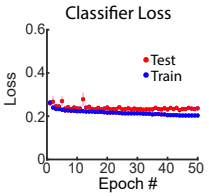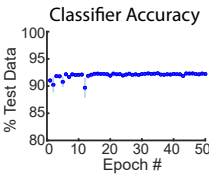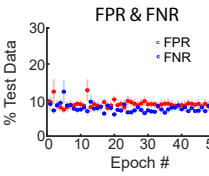

F

Human Observer 1 vs. Human Observer 2  
n = 33,000 frames

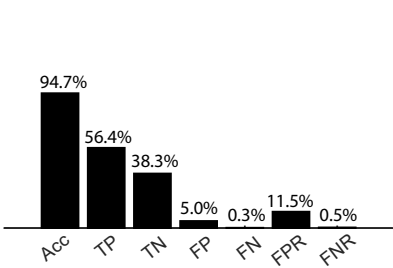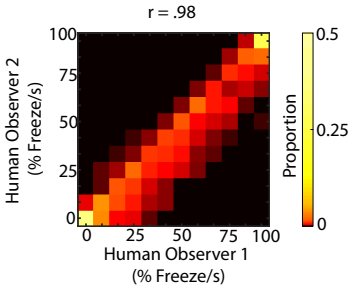

Supplement: supp [file elife_poa_e54936_Figure_1_figure_supplement_1.pdf › elife_poa_e54936_Figure_1_figure_supplement_1.pdf]
