# Supplementary material for: Distinct signals in medial and lateral VTA dopamine neurons modulate fear extinction at different times
Source: eLife journal article supplement (doi:10.7554/elife.54936), 2020-06-10

A

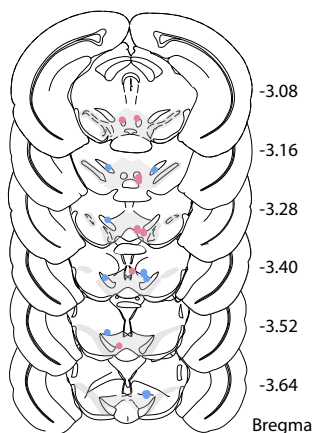

B

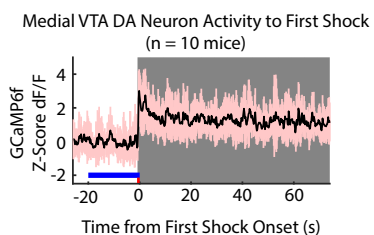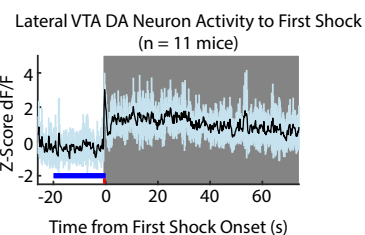

C

Medial VTA to Shock Only

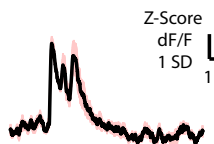

Lateral VTA to Shock Only

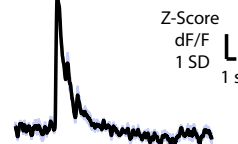

D

Example Mouse - Fiber in Medial VTA

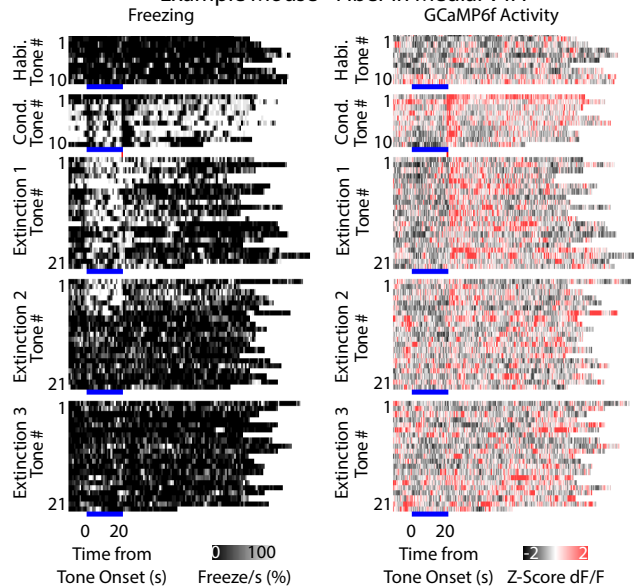

E

Example Mouse - Fiber in Lateral VTA

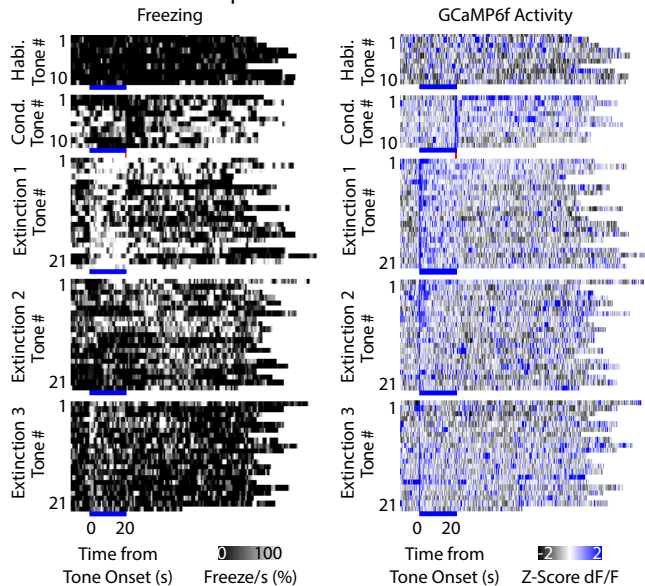

F

Freezing Behavior  
(n = 21 mice)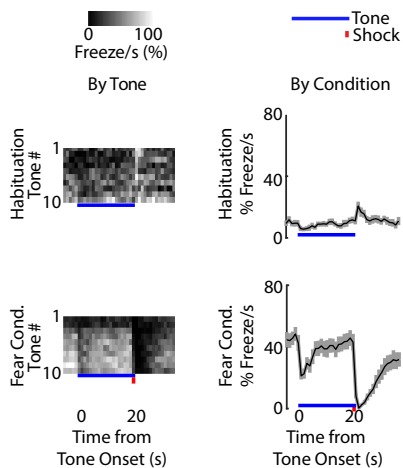

G

Medial VTA DA Neuron Activity  
(n = 10 mice)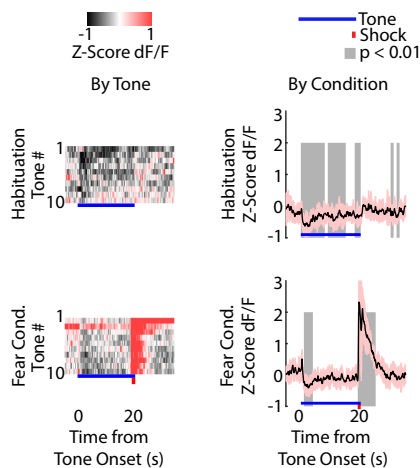

H

Lateral VTA DA Neuron Activity  
(n = 11 mice)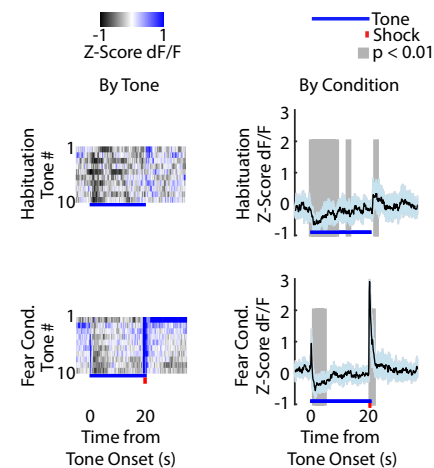

Supplement: supp [file elife_poa_e54936_Figure_3_figure_supplement_1.pdf › elife_poa_e54936_Figure_3_figure_supplement_1.pdf]
