# Supplementary material for: Distinct signals in medial and lateral VTA dopamine neurons modulate fear extinction at different times
Source: eLife journal article supplement (doi:10.7554/elife.54936), 2020-06-10

A

Medial VTA DA Fibers  
Tone Offset Inhibition

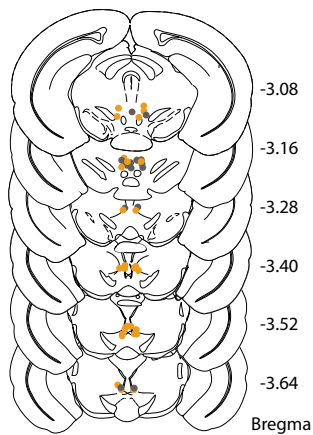

B

Lateral VTA DA Fibers  
Tone Offset Inhibition

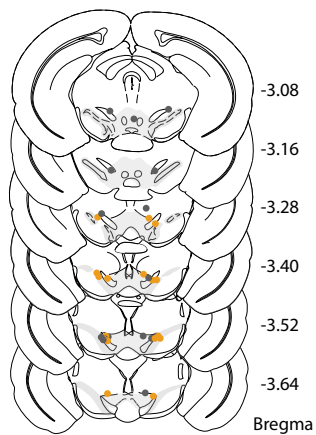

C

Lateral VTA DA Fibers  
Tone Onset Inhibition

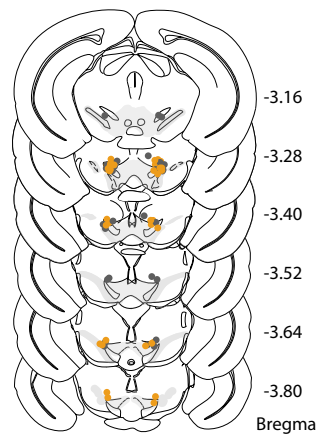

D

SNc DA Fibers  
Tone Offset Inhibition

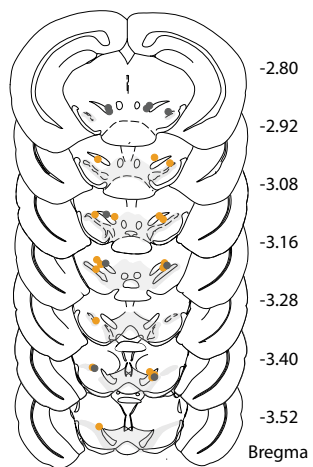

Supplement: supp [file elife_poa_e54936_Figure_5_figure_supplement_2.pdf › elife_poa_e54936_Figure_5_figure_supplement_2.pdf]
