# Supplementary material for: Distinct signals in medial and lateral VTA dopamine neurons modulate fear extinction at different times
Source: eLife journal article supplement (doi:10.7554/elife.54936), 2020-06-10

A

## Tone Offset Inhibition Protocol

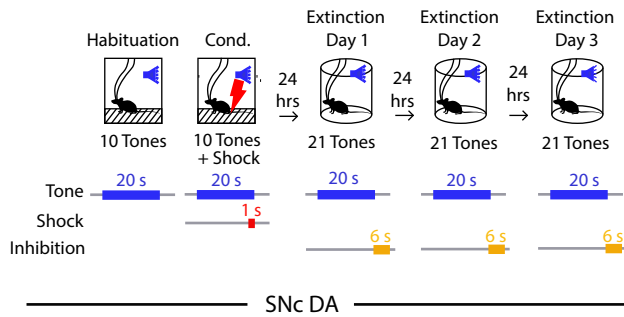

B

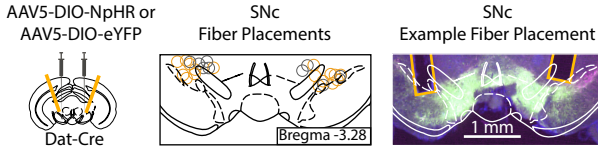

C

## Tone Freezing During Each Experiment Condition

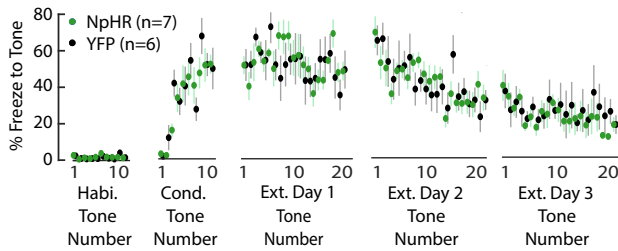

D

## Second-by-Second Freezing During Each Extinction Day

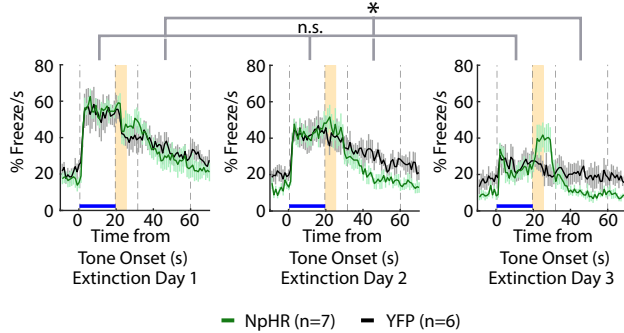

Supplement: supp [file elife_poa_e54936_Figure_5_figure_supplement_3.pdf › elife_poa_e54936_Figure_5_figure_supplement_3.pdf]
