# Supplementary figures and images for: Distinct signals in medial and lateral VTA dopamine neurons modulate fear extinction at different times
Source: eLife journal article supplement (doi:10.7554/elife.54936), 2020-06-10

A

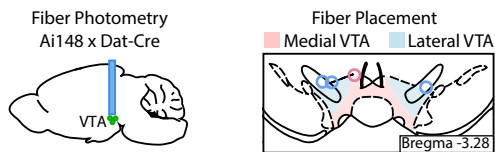

B

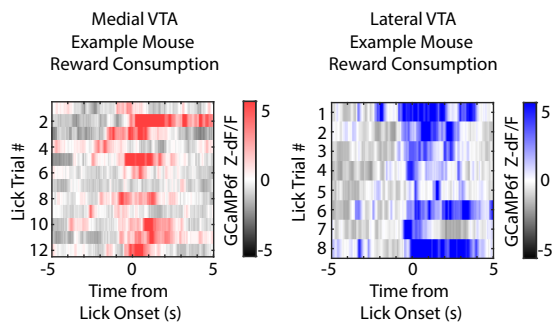

C

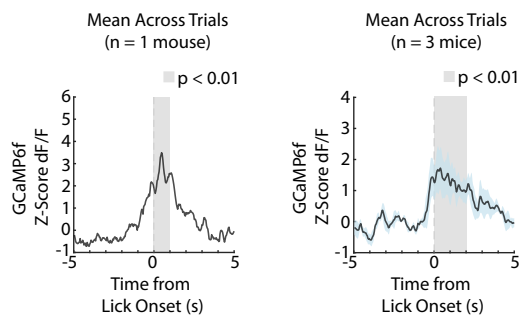

Supplement: supp [file elife_poa_e54936_Figure_3_figure_supplement_2.pdf › elife_poa_e54936_Figure_3_figure_supplement_2.pdf]

A

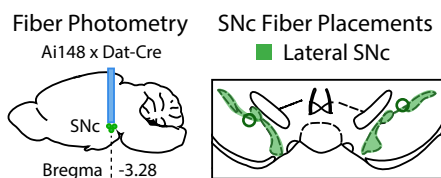

B

## Freezing Behavior

(n = 2 mice)

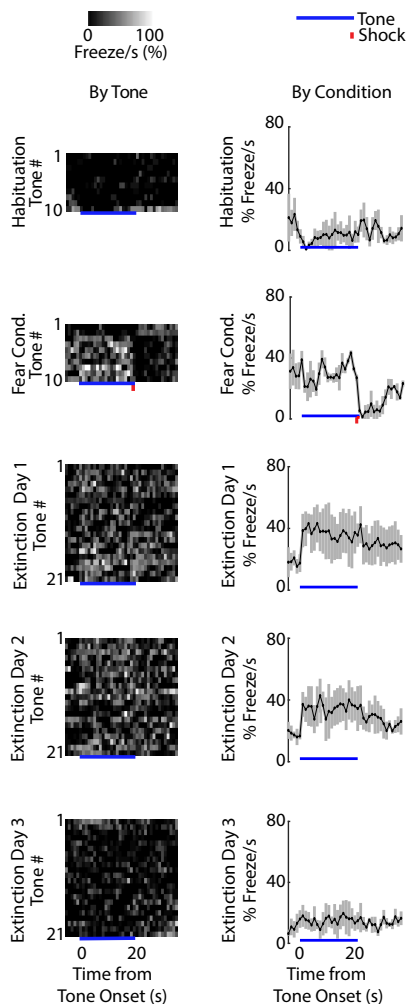

C

## Lateral SNc DA Terminal Activity

(n = 2 mice)

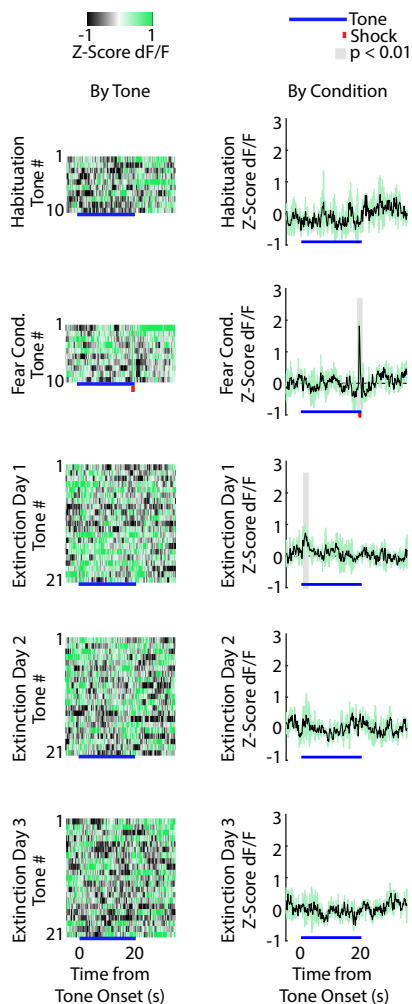

Supplement: supp [file elife_poa_e54936_Figure_3_figure_supplement_3.pdf › elife_poa_e54936_Figure_3_figure_supplement_3.pdf]

A

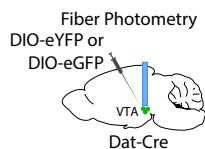

B

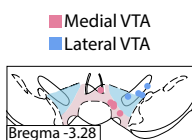

C

### Freezing Behavior (n = 8 mice)

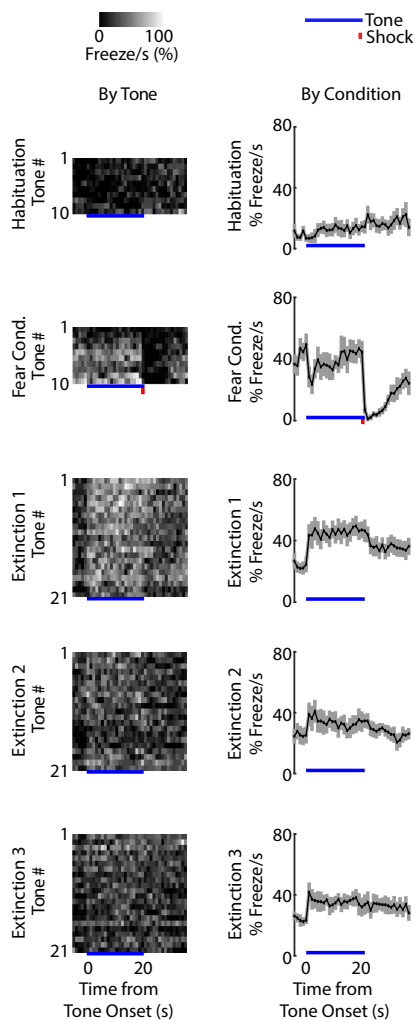

D

### Medial VTA YFP Activity (n = 4 mice)

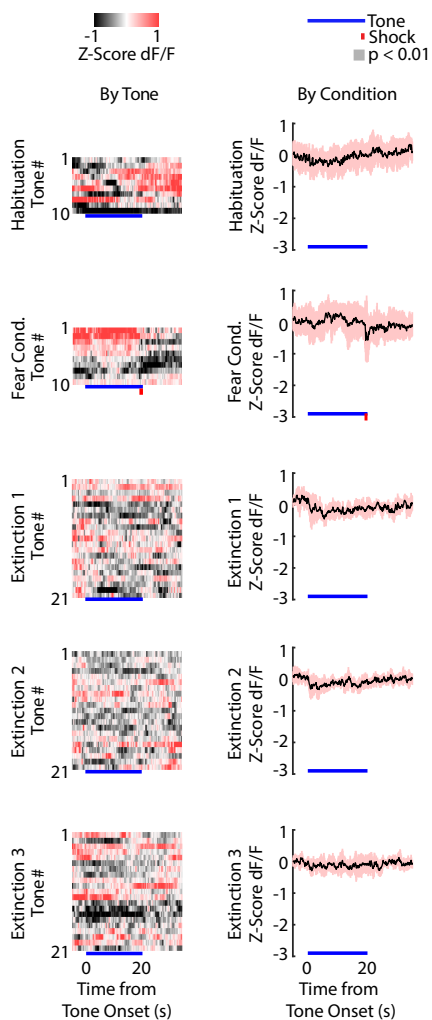

E

### Lateral VTA YFP Activity (n = 4 mice)

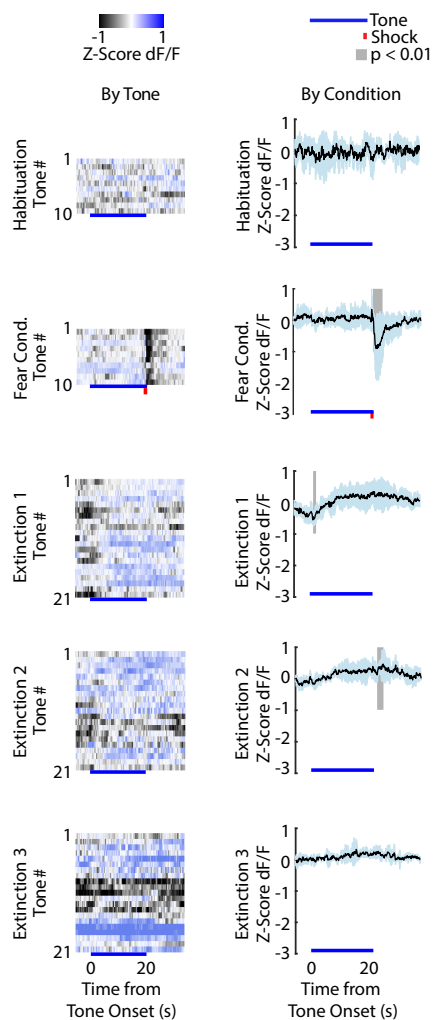

Supplement: supp [file elife_poa_e54936_Figure_3_figure_supplement_4.pdf › elife_poa_e54936_Figure_3_figure_supplement_4.pdf]

A

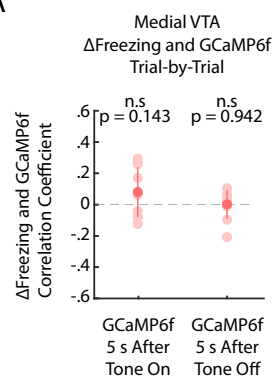

B

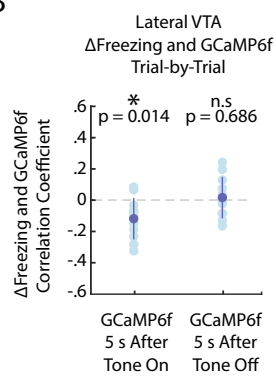

Supplement: supp [file elife_poa_e54936_Figure_4_figure_supplement_1.pdf › elife_poa_e54936_Figure_4_figure_supplement_1.pdf]

A

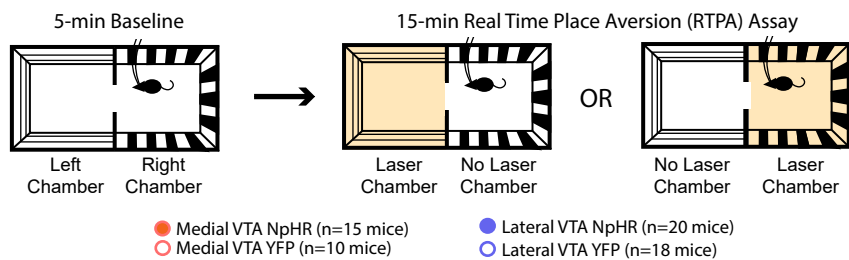

B

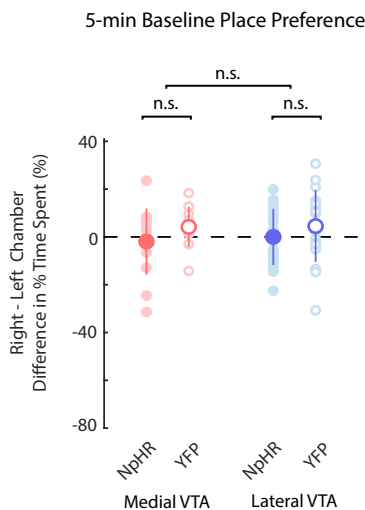

C

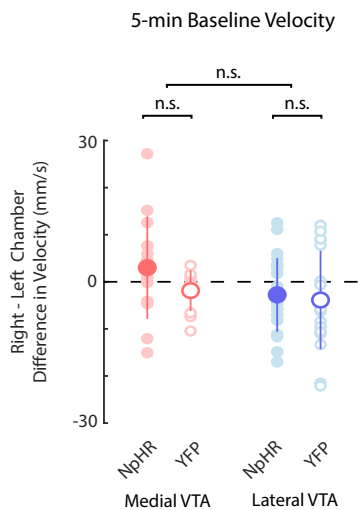

D

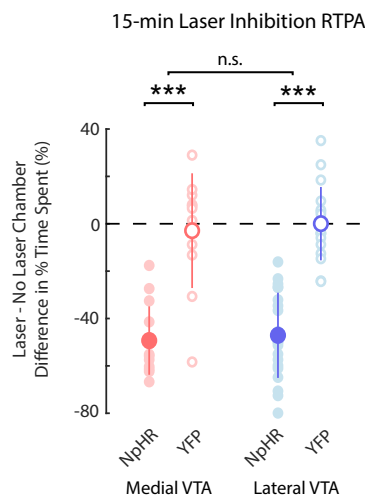

E

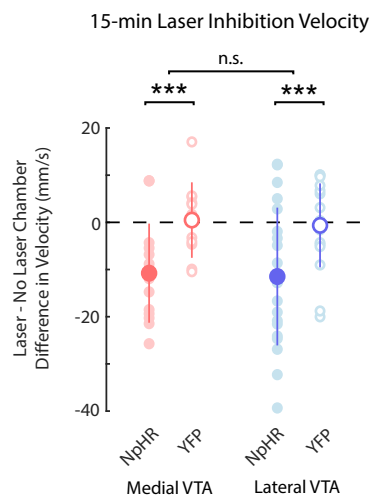

Supplement: supp [file elife_poa_e54936_Figure_5_figure_supplement_1.pdf › elife_poa_e54936_Figure_5_figure_supplement_1.pdf]
